# Supplementary material for: Sow-Offspring Diets Supplemented with Probiotics and Synbiotics Are Associated with Offspring’s Growth Performance and Meat Quality
Source: MDPI journal article supplement (doi:10.3390/ijms24087668), 2023-04-21
Supplement: s1 [file s1]

**Table S1.** Composition and nutrient levels of basal diets for sows (air-dry basis; %)

| Items                          | Pregnant diet | Lactating diet |
|--------------------------------|---------------|----------------|
| Ingredients                    |               |                |
| Corn                           | 37.50         | 66.00          |
| Soybean meal                   | 9.50          | 25.00          |
| Wheat bran                     | 14.00         | 5.00           |
| Barley                         | 25.00         |                |
| Soybean hull                   | 10.00         |                |
| Pregnant premix <sup>1)</sup>  | 4.00          |                |
| Lactating premix <sup>2)</sup> |               | 4.00           |
| Total                          | 100.00        | 100.00         |
| Nutrient levels <sup>3)</sup>  |               |                |
| Digestible energy (MJ/Kg)      | 12.55         | 13.87          |
| Crude protein                  | 12.82         | 16.30          |
| Crude fiber                    | 4.56          | 2.87           |
| SID <sup>4)</sup> Lys          | 0.48          | 0.75           |
| SID Met+ Cys                   | 0.43          | 0.51           |
| SID Thr                        | 0.37          | 0.53           |
| SID Trp                        | 0.13          | 0.17           |
| Calcium                        | 0.62          | 0.65           |
| Phosphorus                     | 0.47          | 0.50           |

<sup>1)</sup> Pregnant premix provided the following per kg of diet: CaHPO<sub>4</sub>·2H<sub>2</sub>O 10 g, NaCl 4 g, CuSO<sub>4</sub>·5H<sub>2</sub>O 80 mg, FeSO<sub>4</sub>·H<sub>2</sub>O 360 mg, ZnSO<sub>4</sub>·H<sub>2</sub>O 240 mg, MnSO<sub>4</sub>·H<sub>2</sub>O 100 mg, MgSO<sub>4</sub>·7H<sub>2</sub>O 1 g, 1% ICl 50 mg, 1% Na<sub>2</sub>SeO<sub>3</sub> 36 mg, 1% CoCl<sub>2</sub> 16 mg, NaHCO<sub>3</sub> 1.4 g, VA 10 000 IU, VD<sub>3</sub> 1 800 IU, VE 20 mg, VK<sub>3</sub> 2.4 mg, VB<sub>1</sub> 1.6 mg, VB<sub>2</sub> 6 mg, VB<sub>6</sub> 1.6 mg, VB<sub>12</sub> 0.024 mg, folic acid 1.2 mg, nicotinamide 20 mg, pantothenic acid 12 mg, biotin 0.12 mg, ferrous glycinate 100 mg, choline chloride 1g, phytase 200 mg, fruity 80 mg, and limestone 12 g.

<sup>2)</sup> Lactating premix provided the following per kg of the diet: CaHPO<sub>4</sub>·2H<sub>2</sub>O 10 g, NaCl 4 g, CuSO<sub>4</sub>·5H<sub>2</sub>O 80 mg, FeSO<sub>4</sub>·H<sub>2</sub>O 360 mg, ZnSO<sub>4</sub>·H<sub>2</sub>O 240 mg, MnSO<sub>4</sub>·H<sub>2</sub>O 100 mg, 1% ICl 50 mg, 1% Na<sub>2</sub>SeO<sub>3</sub> 36 mg, 1% CoCl<sub>2</sub> 16 mg, NaHCO<sub>3</sub> 1.4 g, VA 10 000 IU, VD<sub>3</sub> 1 800 IU, VE 20 mg, VK<sub>3</sub> 2.4 mg, VB<sub>1</sub> 1.6 mg, VB<sub>2</sub> 6 mg, VB<sub>6</sub> 1.6 mg, VB<sub>12</sub> 0.024 mg, folic acid 1.2 mg, nicotinamide 20 mg, pantothenic acid 12 mg, biotin 0.12 mg, Lysine 1.5 g, ferrous glycinate 100 mg, choline chloride 1g, phytase 200 mg, fruity 80 mg, limestone 12 g.

<sup>3)</sup> Nutrient levels were calculated values.

<sup>4)</sup> SID: standard ileum digestible.

**Table S2.** Composition and nutrient levels of basal diets for weaned Bama mini-pigs (air-dry basis; %)

| Items                         | Prophase diet<br>(35–95 d-old) | Anaphase diet<br>(96–125 d-old) |
|-------------------------------|--------------------------------|---------------------------------|
| Ingredients                   |                                |                                 |
| Corn                          | 54.92                          | 58.00                           |
| Soybean meal                  | 22.00                          | 18.35                           |
| Wheat bran                    | 10.13                          | 11.35                           |
| Rice bran                     | 8.95                           | 8.30                            |
| Premix <sup>1)</sup>          | 4.00                           | 4.00                            |
| Total                         | 100.00                         | 100.00                          |
| Nutrient levels <sup>2)</sup> |                                |                                 |
| Digestible energy (MJ/kg)     | 13.50                          | 13.42                           |
| Crude protein                 | 16.13                          | 14.90                           |
| Calcium                       | 0.45                           | 0.44                            |
| Total Phosphorus              | 0.49                           | 0.49                            |
| Lys                           | 1.40                           | 1.30                            |
| Met + Cys                     | 0.69                           | 0.66                            |
| Thr                           | 0.78                           | 0.74                            |

<sup>1)</sup> Premix provided the following per kilogram of diets: enzyme preparation (including phytase, protease, and lipase) 1.2 g, VA 26 000 IU, VD<sub>3</sub> 10 000 IU, VE 70 IU, VK<sub>3</sub> 10 mg, VB<sub>1</sub> 10 mg, VB<sub>2</sub> 25 mg, VB<sub>6</sub> 10 mg, VB<sub>12</sub> 0.075 mg, biotin 0.4 mg, folic acid 5 mg, nicotinamide 100 mg, pantothenic 50 mg, choline 1600 mg, flavoring agent 500 mg, edulcorant 300 mg, acidulating agent 5 g, CuSO<sub>4</sub>·5H<sub>2</sub>O 898 mg, MnSO<sub>4</sub>·H<sub>2</sub>O 298 mg, ZnSO<sub>4</sub>·H<sub>2</sub>O 600 mg, FeSO<sub>4</sub>·H<sub>2</sub>O 501 mg, Ca(IO<sub>3</sub>)<sub>2</sub> 0.9 mg, as Na<sub>2</sub>SeO<sub>3</sub> 0.7 mg, CoSO<sub>4</sub>·H<sub>2</sub>O 1.2 mg, glucose 2.1 g, antioxidants 0.4 g, anti-mildew agent 1 g, Ca (as CaHPO<sub>4</sub> and CaCO<sub>3</sub>) 3.42 g, and P (as CaHPO<sub>4</sub>) 1.155 g.

<sup>2)</sup> Nutrient levels were calculated values.

**Table S3.** Primers sequences used for real time-PCR

| <b>Genes</b>   | <b>GenBank ID</b> | <b>Sequence (5'-3')</b>                                   | <b>Size (bp)</b> |
|----------------|-------------------|-----------------------------------------------------------|------------------|
| <i>β-actin</i> | XM_021086047.1    | F: GGCACCACACCTTCTACAACGAG<br>R: TCATCTTCTCACGGTTGGCTTTGG | 102              |
| <i>MyHCI</i>   | NM_213855.2       | F: CTGTCCAAGTTCGCAAGGT<br>R: CTTTGTGCGCCCTCAGGAT          | 176              |
| <i>MyHCIIa</i> | NM_214136.1       | F: GGACCCCCTGAATGACACAG<br>R: CGGTCTGGAAGGAAGAACCC        | 149              |
| <i>MyHCIIx</i> | NM_001104951.2    | F: TGAGGAAGACCGCAAGAACA<br>R: GGTCACTTTTGAGCATTTGGATG     | 272              |
| <i>MyHCIIb</i> | NM_001123141.1    | F: AGGAGCATCAGCGCCTAATC<br>R: TCGGGATAGCTGAGACACCA        | 119              |
| <i>MyoD</i>    | NM_001002824.1    | F: CTATGATGACCCGTGTTTCG<br>R: AGTGTTCTCGGGCTTTAGG         | 101              |
| <i>Myf5</i>    | NM_001278775.1    | F: GGATCAGCAACTCCGAGCAACC<br>R: GCACATGGTAGATGAGCCTGGAAC  | 126              |
| <i>Myf6</i>    | NM_001244672.1    | F: GCTCGTGATGACTGCCAAGGAAG<br>R: CGATGGAAGAAAGGCACCGAAGG  | 80               |
| <i>MyoG</i>    | NM_001012406.1    | F: AAACCTACCTGCCCCGTCCACCTC<br>R: GGTCCCCAGCCCCCTTATCTTCC | 112              |
| <i>IGF1</i>    | NM_214256.1       | F: GACGCTCTTCAGTTCGTGTG<br>R: CTCCAGCCTCCTCAGATCAC        | 141              |
| <i>FBOX32</i>  | NM_001044588.1    | F: AAGGGAACCTCCTCCAGACC<br>R: CCATCCGATACACCCACAT         | 104              |
| <i>MSTN</i>    | NM_214435.2       | F: GCACCAAGCAAACCCCAGAGG<br>R: AGCACCCACAGCGATCTACTACC    | 143              |

Note: *MyHCI*, myosin heavy chain I; *MyHCIIa*, myosin heavy chain IIa; *MyHCIIb*, myosin heavy chain IIb; *MyHCIIx*, myosin heavy chain IIx; *MyoD*, myogenic differentiation factor; *MyoG*, myogenin; *Myf5*, myogenic factor 5; *Myf6*, myogenic factor 6; *IGF-1*, insulin-like growth factor-1; *FBOX32*, muscle atrophy Fbox-1 protein; *MSTN*, myostatin.
